# Supplementary material for: Rational construction of gel-based supramolecular logic gates by using a functional gelator with multiple-stimuli responsive properties
Source: Royal Society of Chemistry journal article supplement (doi:10.1039/c4sm01574f), 2014-08-26
Supplement: c4sm01574f1.pdf [file c4sm01574f1.pdf]

*Electronic Supplementary Information for*

**Rational Construction of Gel-based Supramolecular Logic Gates by Functional Gelator with Multiple-Stimuli Responsive Properties**

Kaiqi Fan <sup>a</sup>, Jun Yang <sup>bc</sup>, Xiaobo Wang <sup>d</sup>, Jian Song<sup>\*bc</sup>

<sup>a</sup> School of Material and Chemical Engineering, Zhengzhou University of Light Industry, Zhengzhou 450002, P.R. China

<sup>b</sup> School of Chemical Engineering and Technology, Tianjin University, Tianjin 300072, China. E-mail: songjian@tju.edu.cn

<sup>c</sup> The Co-Innovation Center of Chemistry and Chemical Engineering of Tianjin, Tianjin 300072, China

<sup>d</sup> Journal Editorial Department, Zhengzhou University of Light Industry, Zhengzhou 450002, P.R. China School of Chemical Engineering and Technology, Tianjin University,

**1. Minimum gelator concentration and gel-sol transition temperatures of **1** in different solvents.**

**Table S1.** Minimum gelator concentration (MGC) at 25 °C of gelator **1** in different organic-water mixtures. Gel-sol transition temperatures ( $T_{\text{gel}}$ ) of the gels containing 5 mM gelator are also listed.

| solvent             | methanol/H <sub>2</sub> O<br>(v/v = 1:1) | ethanol/H <sub>2</sub> O<br>(v/v = 1:1) | DMSO/H <sub>2</sub> O<br>(v/v = 1:1) | DMF/H <sub>2</sub> O<br>(v/v = 1:1) |
|---------------------|------------------------------------------|-----------------------------------------|--------------------------------------|-------------------------------------|
| MGC/mM              | 3.0                                      | 3.1                                     | 2.7                                  | 2.9                                 |
| $T_{\text{gel}}$ /K | 315                                      | 321                                     | 331                                  | 328                                 |

## 2. TEM images of the xerogel of **1**.

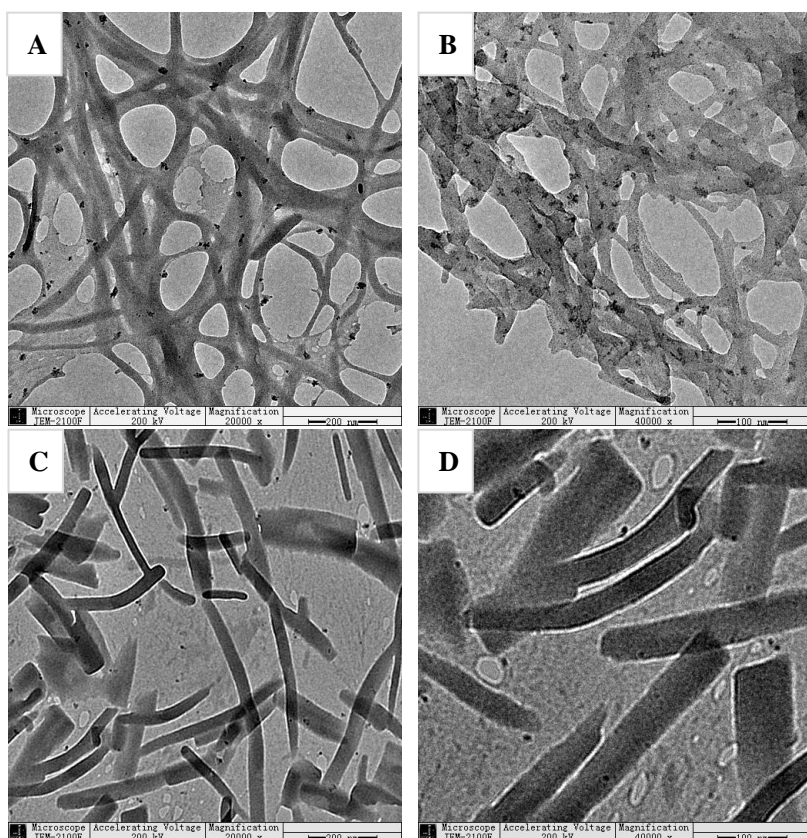

**Fig. S1.** TEM images of a xerogel of **1** obtained from DMSO/H<sub>2</sub>O (v/v = 1/1, A and B) and DMF/H<sub>2</sub>O (v/v = 1/1, C and D).

### 3. XRD profile of the xerogel of **1** measured at room temperature

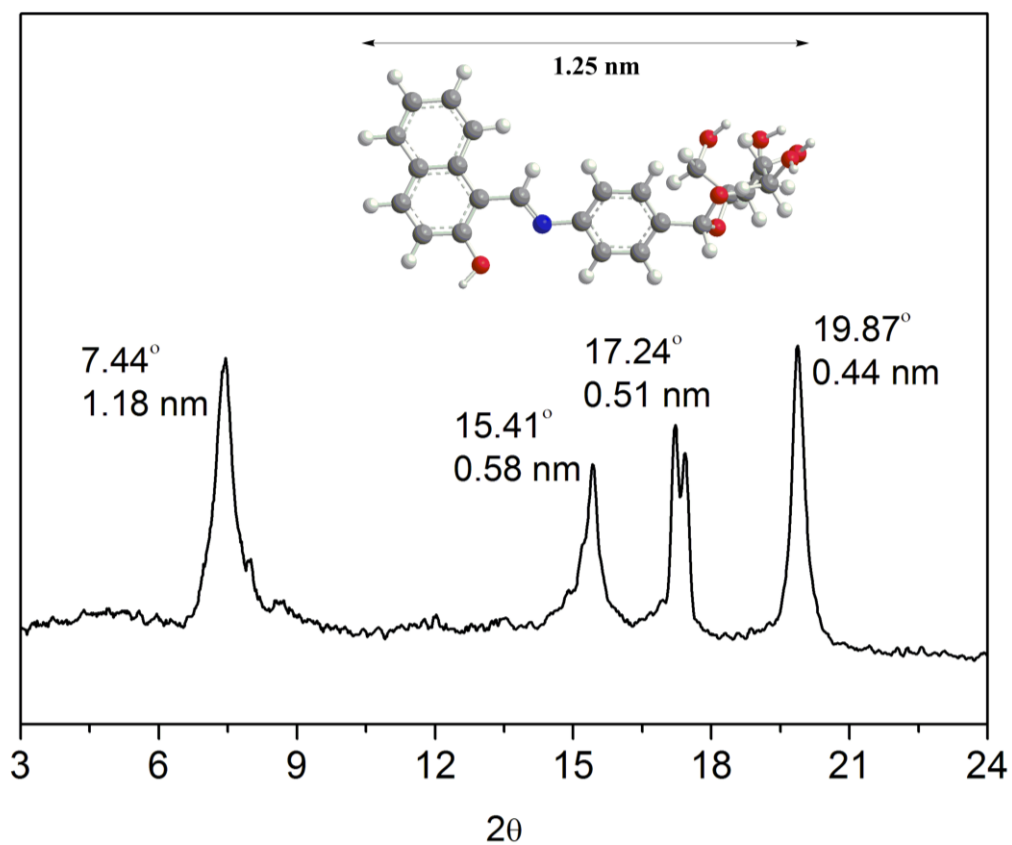

**Fig. S2.** XRD profile of the xerogel of **1** measured at room temperature. The xerogel was obtained from DMSO/H<sub>2</sub>O (v/v = 1:1).
